# Supplementary material for: One-pot in situ synthesis of a CoFe2O4nanoparticle-reduced graphene oxide nanocomposite with high performance for levodopa sensing
Source: Royal Society of Chemistry journal article supplement (doi:10.1039/c5ra15379d), 2015-01-01
Supplement: c5ra15379d1.pdf [file c5ra15379d1.pdf]

Supporting Information

**One-pot *in situ* synthesis of CoFe<sub>2</sub>O<sub>4</sub> nanoparticles-reduced  
graphene oxide nanocomposite with high performance for  
levodopa sensing**

Junhua Li <sup>a,b,c</sup>, Haibo Feng <sup>a</sup>, Jianbo Jiang <sup>a</sup>, Yonglan Feng <sup>b</sup>, Zhifeng Xu <sup>b</sup>, Dong Qian  
<sup>a,c,\*</sup>

<sup>a</sup> College of Chemistry and Chemical Engineering, Central South University, Changsha  
410083, PR China

<sup>b</sup> College of Chemistry and Material Science, Hengyang Normal University, Hengyang  
421008, PR China

<sup>c</sup> State Key Laboratory of Powder Metallurgy, Central South University, Changsha 410083,  
PR China

Corresponding author. Tel/Fax: +86-731-88879616. E-mail address:  
qiandong6@vip.sina.com (D. Qian).

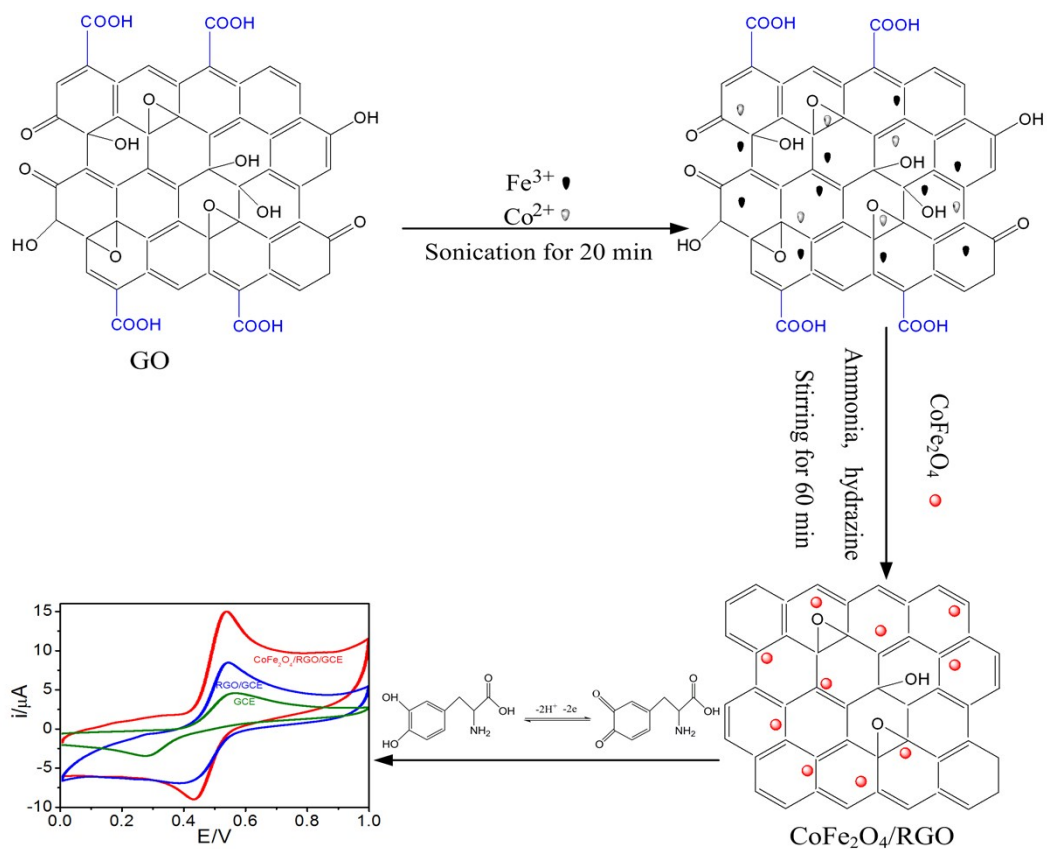

**Fig. S1** Schematic diagram of synthesis of  $\text{CoFe}_2\text{O}_4/\text{RGO}$  composite and levodopa oxidation at  $\text{CoFe}_2\text{O}_4/\text{RGO}$  film.

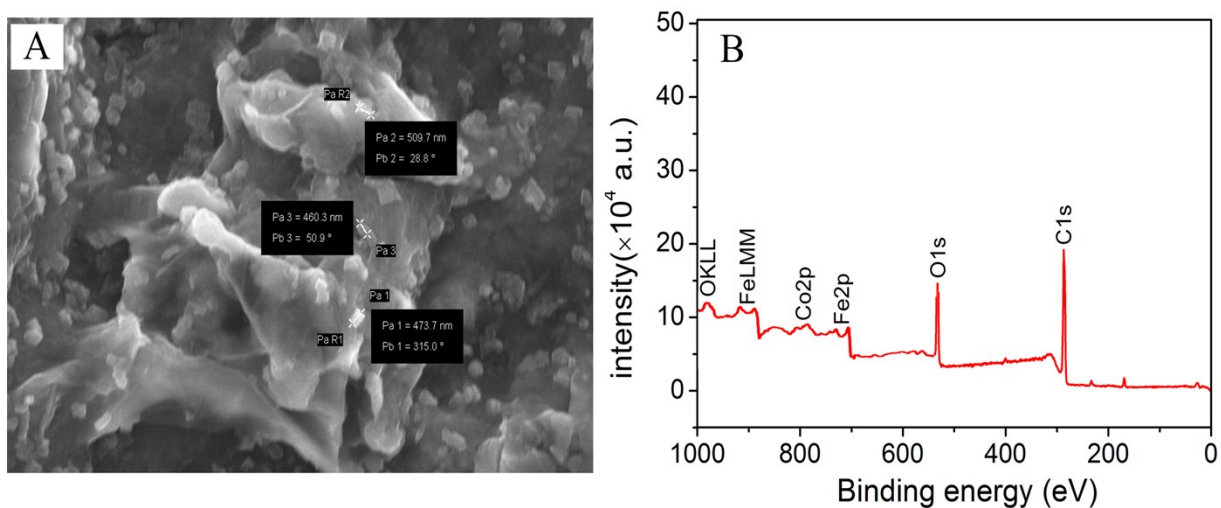

**Fig. S2** (A) The particle sizes of  $\text{CoFe}_2\text{O}_4$  nanoparticles and (B) wide scan XPS spectrum of  $\text{CoFe}_2\text{O}_4/\text{RGO}$  composite.

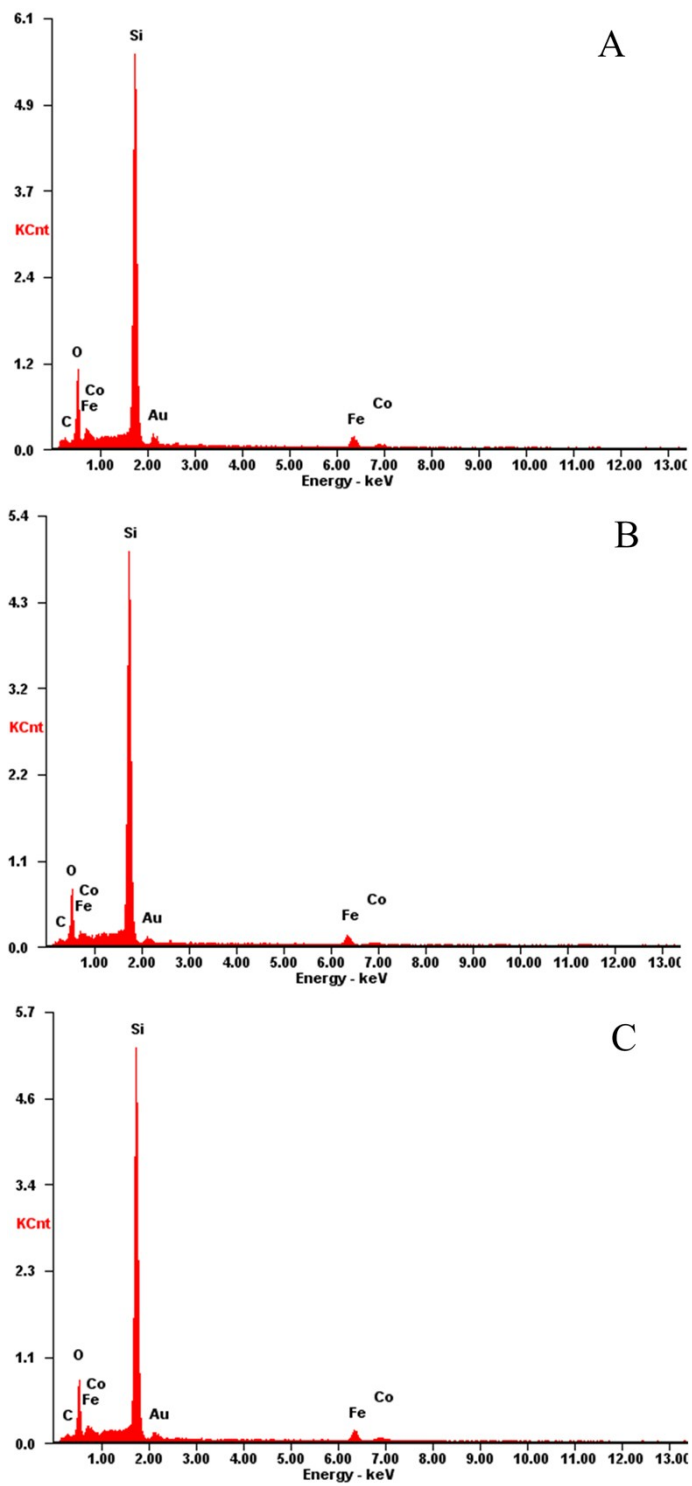

**Fig. S3** EDX images obtained at different regions of  $\text{CoFe}_2\text{O}_4/\text{RGO}$  composite.

### Electrochemical effective surface area

As shown in Fig. S3A and B, the electrochemical effective surface areas for GCE, RGO/GCE and CoFe<sub>2</sub>O<sub>4</sub>/RGO/GCE can be calculated by the slope of plot of  $Q$  vs.  $t^{1/2}$ , which is obtained by chronocoulometry using 0.5 mM K<sub>3</sub>[Fe(CN)<sub>6</sub>] as the model complex based on Equation (1) given by Anson[1]:

$$Q(t) = \frac{2nFAC_0D^{1/2}t^{1/2}}{\pi^{1/2}} + Q_{dl} + Q_{ads} \quad (1)$$

where  $n$  is the number of transferred electron ( $n$  of K<sub>3</sub>[Fe(CN)<sub>6</sub>] is 1),  $A$  is the surface area of the working electrode,  $C_0$  is the concentration of substrate,  $D$  is the diffusion coefficient ( $D$  of K<sub>3</sub>[Fe(CN)<sub>6</sub>] is  $7.6 \times 10^{-6}$  cm<sup>2</sup> s<sup>-1</sup>),  $Q_{dl}$  is the double layer charge which can be eliminated by the background subtraction,  $Q_{ads}$  is the Faradic charge. As shown in Fig. S3B, the slopes of the linear relationship between  $Q$  and  $t^{1/2}$  for CoFe<sub>2</sub>O<sub>4</sub>/RGO/GCE, RGO/GCE and bare GCE can be obtained to be 42.83, 26.48 and 8.05 μC s<sup>-1/2</sup>, respectively. Thus  $A$  can be calculated as 0.285, 0.176 and 0.0536 cm<sup>2</sup>, correspondingly. The results indicate that the electrochemical effective surface area increases obviously after the modification of GCE with CoFe<sub>2</sub>O<sub>4</sub>/RGO, which could enhance the total adsorption capacity of levodopa, leading to the increase of current response of levodopa.

### References:

- [1] F. Anson, Application of potentiostatic current integration to the study of the adsorption of cobalt(iii)-(ethylenedinitrilo)(tetraacetate) on mercury electrodes, Anal. Chem. 36 (1964) 932–934.

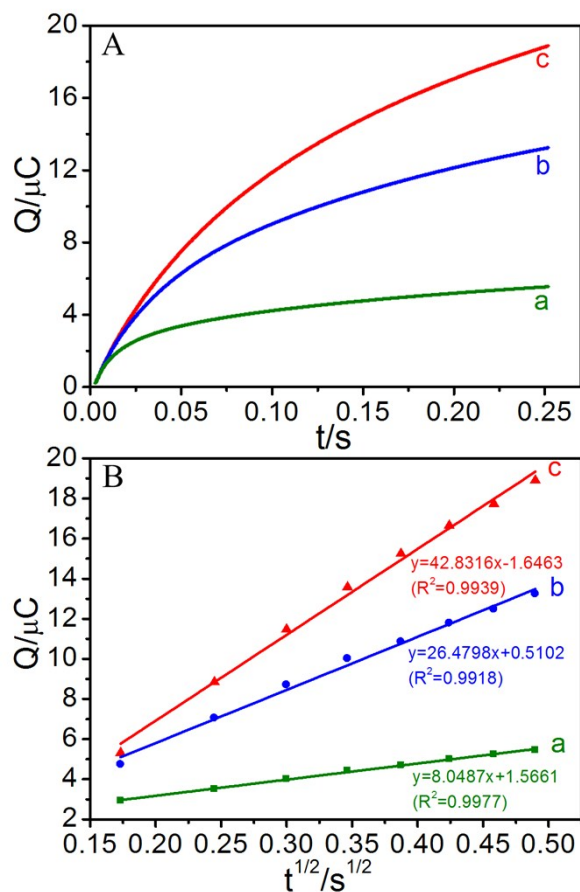

**Fig. S4** (A) Plots of  $Q-t$  curves acquired at GCE (a), RGO/GCE (b) and CoFe<sub>2</sub>O<sub>4</sub>/RGO/GCE (c) in 1 M KCl containing 0.5 mM K<sub>3</sub>[Fe(CN)<sub>6</sub>]; (B) plots of  $Q-t^{1/2}$  curves derived from the data of chronocoulometry for GCE (a), RGO/GCE (b) and CoFe<sub>2</sub>O<sub>4</sub>/RGO/GCE (c). The pulse width, sample interval and quiet time of chronocoulometry were 0.25 s, 0.25 ms and 2 s, respectively.

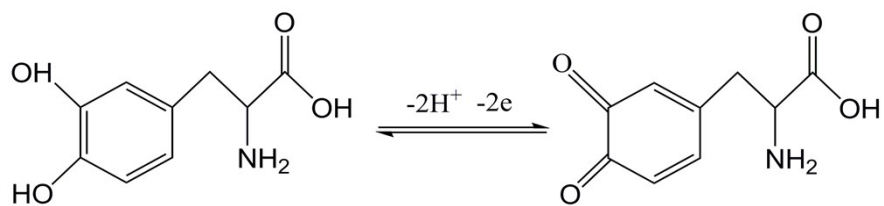

**Scheme 1** The possible mechanism of the levodopa oxidation at  $\text{CoFe}_2\text{O}_4/\text{RGO}/\text{GCE}$ .

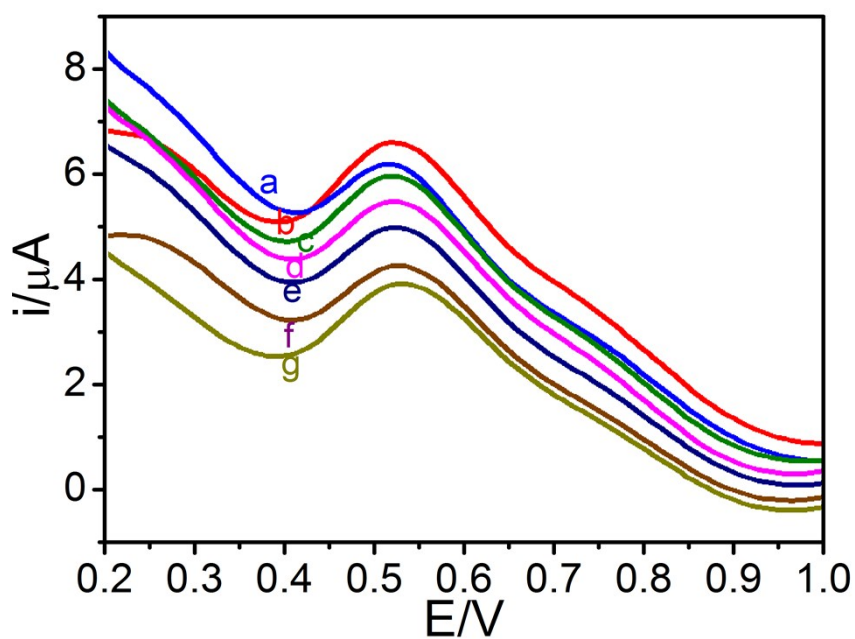

**Fig. S5** The influence of different accumulation potential on the DPV response of  $10 \mu\text{M}$  levodopa (accumulation potentials of curves a-g:  $-0.4$ ,  $-0.3$ ,  $-0.2$ ,  $-0.1$ ,  $0$ ,  $0.1$  and  $0.2$  V).

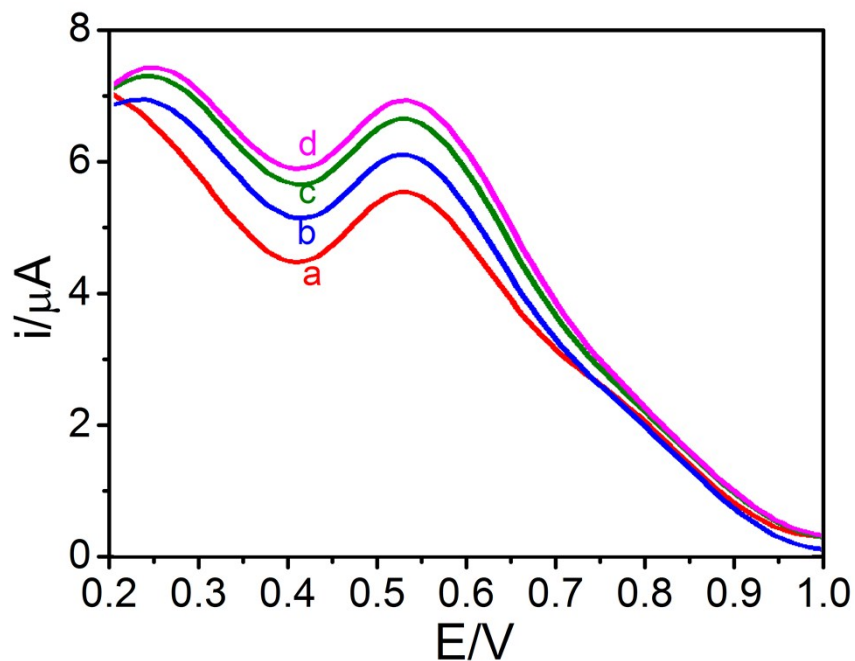

**Fig. S6** The influence of different accumulation time on the DPV response of 10  $\mu\text{M}$  levodopa (accumulation times of curves a–d: 50, 100, 150 and 200 s).

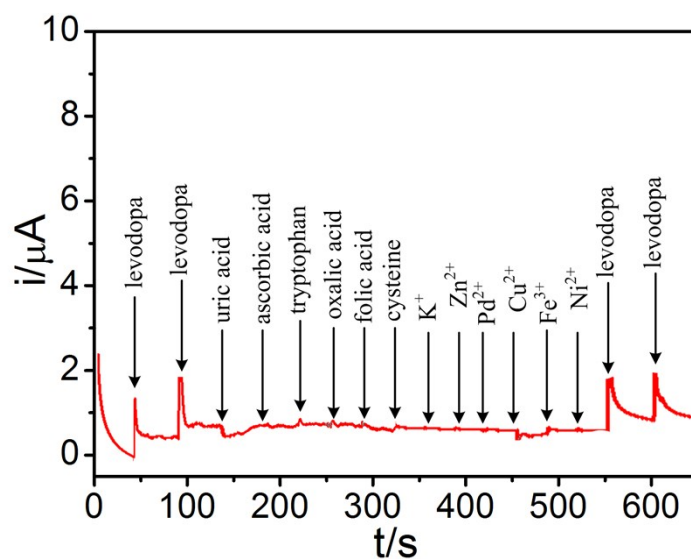

**Fig. S7** The effects of some interfering substances (20  $\mu\text{M}$  uric acid, ascorbic acid, tryptophan, oxalic acid, folic acid, cysteine,  $\text{K}^+$ ,  $\text{Zn}^{2+}$ ,  $\text{Pd}^{2+}$ ,  $\text{Cu}^{2+}$ ,  $\text{Fe}^{3+}$  and  $\text{Ni}^{2+}$ ) on the determination of levodopa at  $\text{CoFe}_2\text{O}_4/\text{RGO}/\text{GCE}$ . Applied potential is 0.5 V.

**Table S1** Influences of some possible interfering substances on the DPV determination of 1.0  $\mu\text{M}$  levodopa (n = 3).

| Interfering substance  | Concentration ( $\mu\text{M}$ ) | Oxidation peak current <sup>b</sup> ( $\mu\text{A}$ ) | Relative error(%) |
|------------------------|---------------------------------|-------------------------------------------------------|-------------------|
| – <sup>a</sup>         | 1.0                             | 3.885                                                 | –                 |
| Ascorbic acid          | 10.0                            | 3.992                                                 | 2.75              |
| Uric acid              | 10.0                            | 3.965                                                 | 2.06              |
| Adrenaline             | 10.0                            | 3.696                                                 | –4.86             |
| benzene                | 10.0                            | 3.812                                                 | –1.88             |
| hydroquinone           | 10.0                            | 3.712                                                 | –4.45             |
| 4-aminophenol          | 10.0                            | 3.768                                                 | –3.01             |
| 2-chlorophenol         | 10.0                            | 3.722                                                 | –4.20             |
| Guanine                | 10.0                            | 4.033                                                 | 3.81              |
| Adenine                | 10.0                            | 3.996                                                 | 2.86              |
| Vitamin B <sub>1</sub> | 10.0                            | 4.011                                                 | 3.24              |
| Glucose                | 10.0                            | 3.980                                                 | 2.45              |
| Dopamine               | 10.0                            | 4.386                                                 | 12.9              |
| D-dopa                 | 10.0                            | 4.457                                                 | 14.7              |

<sup>a</sup> No interfering substance for levodopa determination.

<sup>b</sup> Oxidation peak current for 1.0  $\mu\text{M}$  levodopa.

**Table S2** Electrochemical determination of levodopa in human urine samples (n = 6).

| Sample No. | Spiked ( $\mu\text{M}$ ) | Found ( $\mu\text{M}$ ) | Recovery (%) | RSD (%) |
|------------|--------------------------|-------------------------|--------------|---------|
| 1          | 0                        | –                       | –            | –       |
| 2          | 5.00                     | 4.89                    | 97.8         | 2.86    |
| 3          | 10.00                    | 10.16                   | 101.6        | 1.75    |
| 4          | 20.00                    | 20.63                   | 103.2        | 3.11    |

Note: No obvious DPV signal was found for the unspiked urine samples, indicating that the concentration of levodopa in the urine samples is lower than the detection limit of the proposed method, so levodopa with known concentrations was added and further evaluated by the standard addition method.
